# Supplementary material
Source: PubMed Central journal article supplement (PMC4358751)
Supplement: NIHMS622128-supplement-304353R2_Acknowledgment.pdf [file NIHMS622128-supplement-304353R2_Acknowledgment.pdf]

## Circulation Research

---

**From:** Bosse,Raphael C <rbosse@ufl.edu>  
**Sent:** Wednesday, August 06, 2014 5:17 PM  
**To:** circulation.research@circresearch.com  
**Cc:** Christopher R. Cogle; Bettencourt, Judith L  
**Subject:** Acknowledgement to Circulation Research on MS # CIRCRES/2014/304353R1

To whom this may concern,

I hereby give permission to be included in Dr. Cogle's paper titled "A Detailed Analysis of Bone Marrow from Patients with Ischemic Heart Disease and Left Ventricular Dysfunction: BM CD34, CD11b and Clonogenic Capacity as Biomarkers for Clinical Outcomes."

Thank you very much.

Sincerely,

Raphael C Bosse  
University of Florida MD-PhD Scholar
